# Supplementary material for: Characterization of the small molecule ARC39, a direct and specific inhibitor of acid sphingomyelinase in vitro
Source: PubMed Central journal article supplement (PMC7269768; doi:10.1194/jlr.ra120000682), 2020-03-10
Supplement: supp_RA120000682_158760_1_supp_487247_q6q3t6.pdf [file supp_RA120000682_158760_1_supp_487247_q6q3t6.pdf]

**Supplemental figures:**

**Characterization of the small molecule ARC39, a direct and specific inhibitor of acid sphingomyelinase *in vitro***

Eyad Naser<sup>1</sup>, Stephanie Kadow<sup>1</sup>, Fabian Schumacher<sup>1,2</sup>, Zainelabdeen H. Mohamed<sup>3,4</sup>, Christian Kappe<sup>3</sup>, Gabriele Hessler<sup>1</sup>, Barbara Pollmeier<sup>1</sup>, Burkhard Kleuser<sup>2</sup>, Christoph Arenz<sup>3</sup>, Katrin Anne Becker<sup>1</sup>, Erich Gulbins<sup>1,5</sup>, Alexander Carpinteiro<sup>1,6</sup>

<sup>1</sup>Department of Molecular Biology, University of Duisburg-Essen, Hufelandstraße 55, 45147 Essen, Germany.

<sup>2</sup>Department of Toxicology, Institute of Nutritional Science, University of Potsdam, Arthur-Scheunert-Allee 114-116, 14558 Nuthetal, Germany.

<sup>3</sup>Institute of Chemistry, Humboldt University of Berlin, Brook-Taylor-Straße 2, 12489 Berlin, Germany.

<sup>4</sup>Medicinal Chemistry Department, Faculty of Pharmacy, Assiut University, Assiut 71526, Egypt.

<sup>5</sup>Department of Surgery, University of Cincinnati, 231 Albert Sabin Way, ML 0558, Cincinnati, Ohio 45229, USA.

<sup>6</sup>Department of Hematology, University Hospital Essen, Hufelandstraße 55, 45147 Essen, Germany.

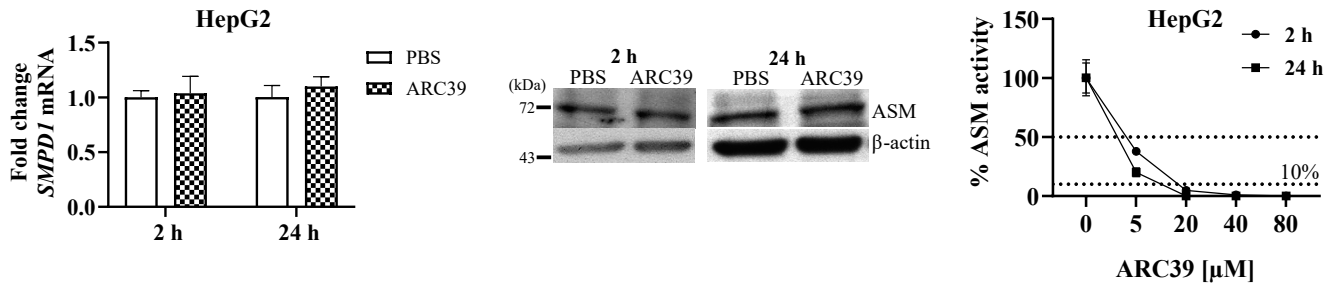

**Supplemental Figure S1.** *Left:* Fold change of *SMPD1* mRNA relative to *HPRT1*, ASM protein level (representative blot) after treatment with 20  $\mu$ M ARC39 as indicated in HepG2 cells. *Right:* ASM enzyme activity. Enzyme activity is normalized to the protein concentration and control values are normalized to their mean. L-ASM activity here was determined with the conventional ASM assay (without  $ZnCl_2$  in the assay buffer). Data represented as mean  $\pm$  SD, n=3 experiments. Two-way ANOVA was used.  $P < 0.05$  for time as a source of variation in ASM activity.

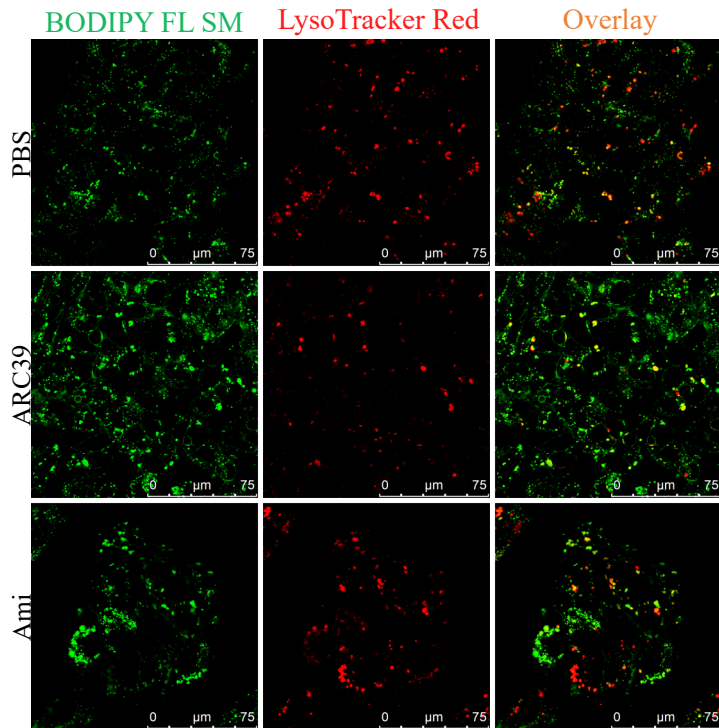

**Supplemental Figure S2. ARC39 leads to lysosomal accumulation of exogenous sphingomyelin .** HepG2 cells were incubated for 24h with 1 μM BODIPY FL sphingomyelin (SM) together with PBS as control, 10 μM ARC39 or 10 μM amitriptyline (Ami) as a positive control. Then, they were incubated 30 min at 37°C with 25 nM LysoTracker Red DND-99. Fresh medium was added then the cells were analyzed by confocal microscopy, magnification 100×.

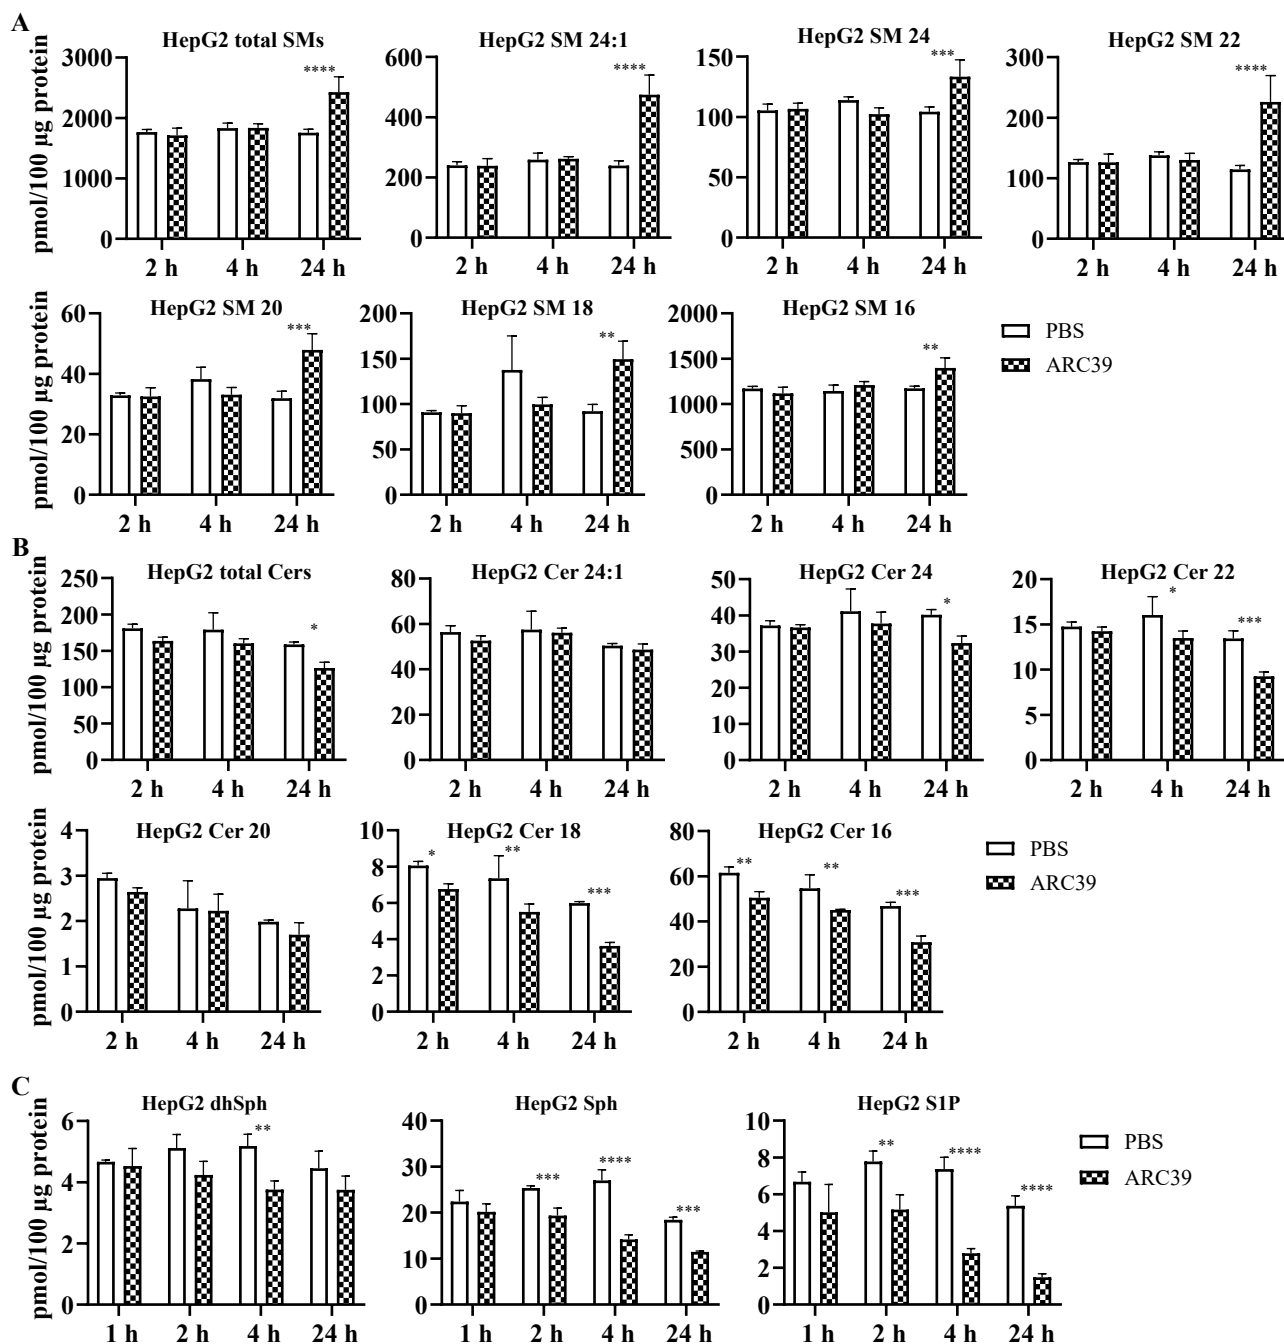

**Supplemental Figure S3. Spingolipidomic analysis after treatment with ARC39 in HepG2 cells.** Cells

were treated with 20  $\mu$ M ARC39 and at the indicated time points the endogenous levels of the following

sphingolipids were determined by mass spectrometry in whole-cell lysates. **(A)** Sphingomyelins (SMs). **(B)**

Ceramides (Cers). Numbers indicate the chain length and saturation of the fatty acyl chain. **(C)**

Dihydrospingosine (dhSph), Sphingosine (Sph) and sphingosine-1-phosphate (S1P), respectively. Data

represented as mean  $\pm$  SD, n=3 experiments. Two-way ANOVA was used followed by Bonferroni correction.

\* $P < 0.05$  \*\* $P < 0.01$  \*\*\* $P < 0.001$  \*\*\*\* $P < 0.0001$ .

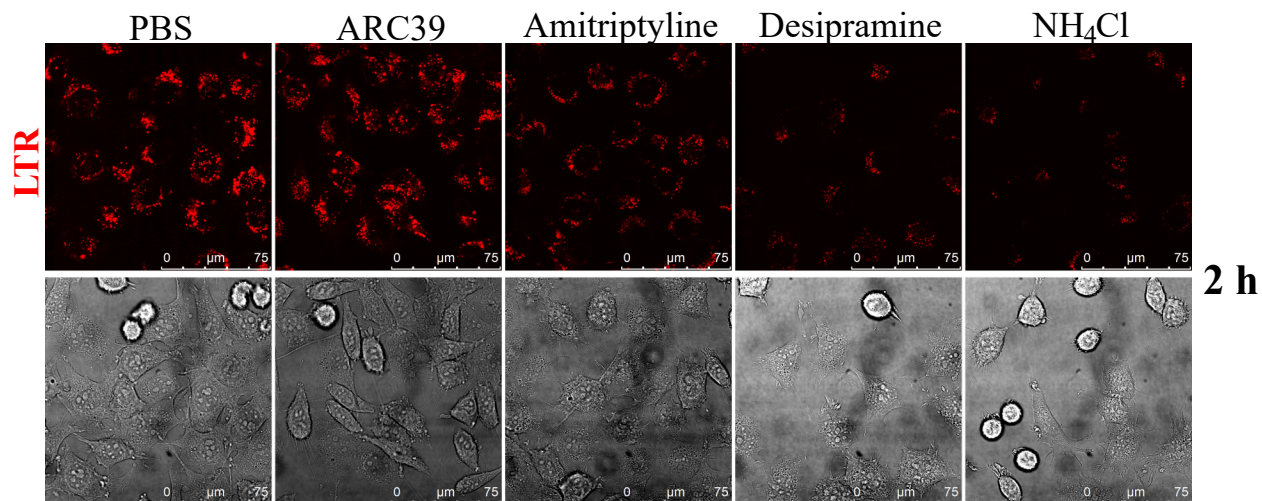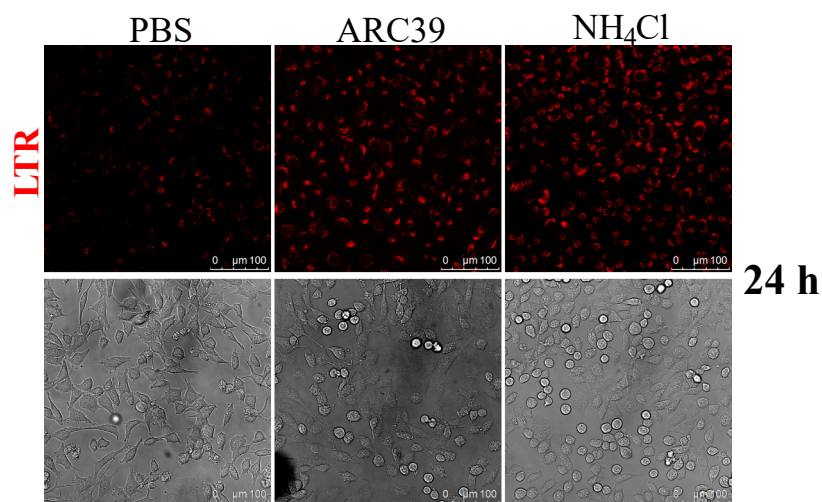

**Supplemental Figure S4. Effect of ARC39 on lysosomes.** L929 cells were treated 2 h (up) or 24 h (down) with PBS, 40  $\mu$ M ARC39 for 2 h, 20  $\mu$ M ARC39 for 24 h, 10  $\mu$ M amitriptyline (2h), 10  $\mu$ M desipramine (2h) or 10 mM  $\text{NH}_4\text{Cl}$  as a positive control. Then, LysoTracker Red (LTR) was added to a final concentration of 25 nM for 30 min at 37°C. Fresh medium was added and the cells were analyzed by confocal microscopy. Magnification 100 $\times$  (up) and 40 $\times$  (down).

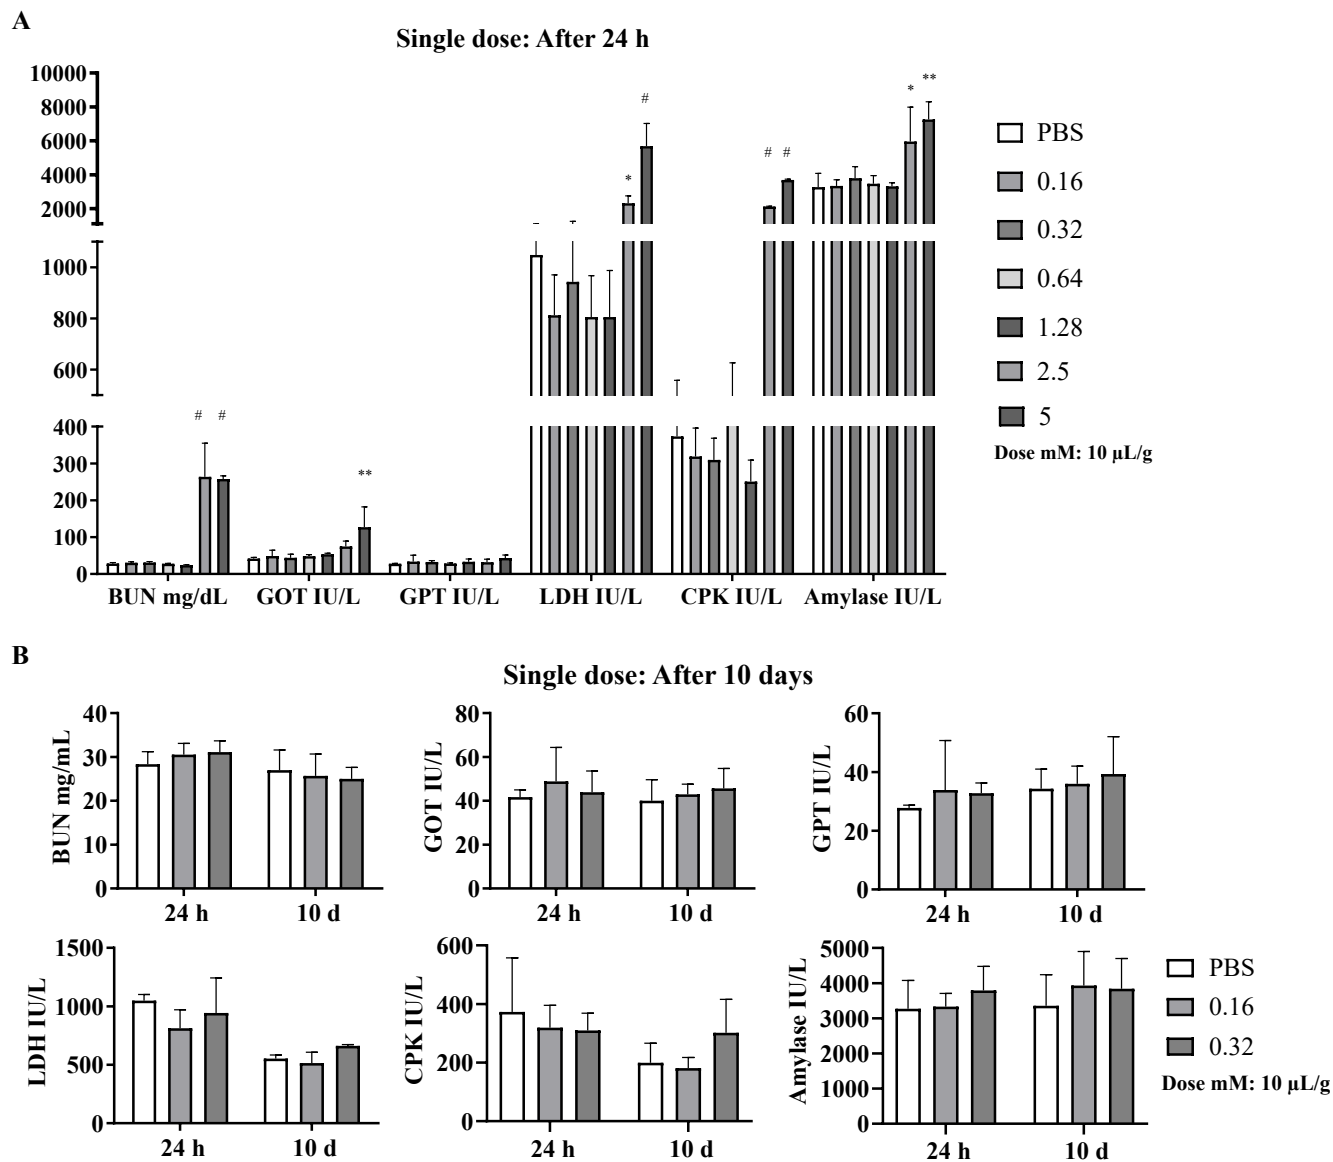

**Supplemental Figure S5. Toxicity of ARC39 *in vivo* in a single-dose regimen.** The compound was applied *i.p.* for one time at the indicated doses. After 24 h in (A) and after 10 d in the same individuals in (B), serum was collected and the following serological markers were assessed: Blood urea nitrogen (BUN), glutamate-oxaloacetate transaminase (GOT) / aspartate transaminase, glutamate-pyruvate transaminase (GPT) / alanine transaminase, lactate dehydrogenase (LDH), creatine phosphokinase (CPK) and amylase. On day 10, only the three groups that did not exhibit morbidity or lethality between 24 h-10 d are shown. Data represented as mean  $\pm$  SD, n=3 mice per group. One-way ANOVA was used in (A) and two-way ANOVA was in (B), both followed by Bonferroni correction. \* $P$ <0.05 \*\* $P$ <0.01 # $P$ <0.0001.

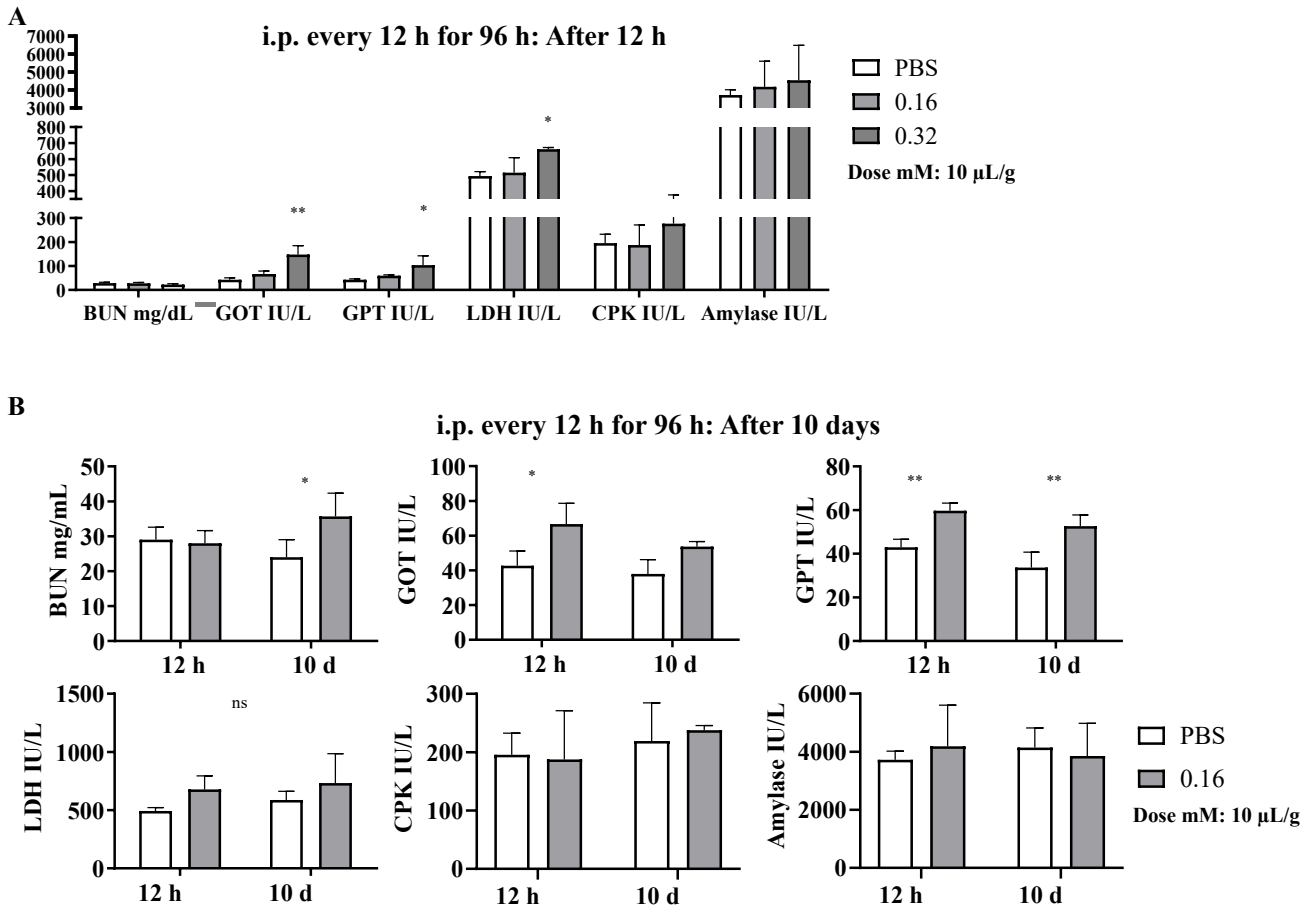

**Supplemental Figure S6. Toxicity of ARC39 *in vivo* in a multiple-dose regimen.** The compound was applied i.p. every 12 h for 96 h. After 12 h in (A) and after 10 d in the same individuals in (B), serum was collected and the following serological markers were assessed: Blood urea nitrogen (BUN), glutamate-oxaloacetate transaminase (GOT) / aspartate transaminase, glutamate-pyruvate transaminase (GPT) / alanine transaminase, lactate dehydrogenase (LDH), creatine phosphokinase (CPK) and amylase. On day 10, only the two groups that did not exhibit morbidity or lethality between 12 h-10 d are shown. Data represented as mean  $\pm$  SD, n=3 mice per group. One-way ANOVA was used in (A) and two-way ANOVA was in (B), both followed by Bonferroni correction. \* $P < 0.05$  \*\* $P < 0.01$ .
